# Supplementary material for: Urinary Malondialdehyde (MDA) Concentrations in the General Population—A Systematic Literature Review and Meta-Analysis
Source: MDPI journal article supplement (doi:10.3390/toxics10040160), 2022-03-29
Supplement: s1 [file s1]

# Supplementary Materials: Urinary Malondialdehyde (MDA) Concentrations in the General Population—A Systematic Literature Review and Meta-Analysis

Antonio Toto, Pascal Wild, Mélanie Graille, Veronica Turcu, Camille Crézé, Maud Hemmendinger, Jean-Jacques Sauvain, Enrico Bergamaschi, Irina Guseva Canu and Nancy B. Hopf

Table S1. Quality assessment criteria.

| Criteria for quality appraisal                                    | Instructions for assessment                                                                                                                                                                                                                                                                                                                                       | Number of points for Quality scoring                                                                                                                                                                                                 |                                                                                                                                                                                                                                                                                                                                 |                                                                                                                                                                                                                                                                                                                                                                                                                                    |
|-------------------------------------------------------------------|-------------------------------------------------------------------------------------------------------------------------------------------------------------------------------------------------------------------------------------------------------------------------------------------------------------------------------------------------------------------|--------------------------------------------------------------------------------------------------------------------------------------------------------------------------------------------------------------------------------------|---------------------------------------------------------------------------------------------------------------------------------------------------------------------------------------------------------------------------------------------------------------------------------------------------------------------------------|------------------------------------------------------------------------------------------------------------------------------------------------------------------------------------------------------------------------------------------------------------------------------------------------------------------------------------------------------------------------------------------------------------------------------------|
|                                                                   |                                                                                                                                                                                                                                                                                                                                                                   | 1 point                                                                                                                                                                                                                              | 2 points                                                                                                                                                                                                                                                                                                                        | 3 points                                                                                                                                                                                                                                                                                                                                                                                                                           |
| I. Study sample quality                                           |                                                                                                                                                                                                                                                                                                                                                                   |                                                                                                                                                                                                                                      |                                                                                                                                                                                                                                                                                                                                 |                                                                                                                                                                                                                                                                                                                                                                                                                                    |
| I.1. Representativeness of the study sample                       | The sample design and sample construction strategy should be clearly described in the article. If not, please consider the inclusion and exclusion criteria                                                                                                                                                                                                       | Convenience sample                                                                                                                                                                                                                   | Consecutive sample                                                                                                                                                                                                                                                                                                              | Probability sample (simple random sample, systematic sample, stratified random sample or cluster sample)                                                                                                                                                                                                                                                                                                                           |
| I.2. Between group comparability and potential for selection bias | To appraise this criteria, please consider the inclusion and exclusion criteria in each of the groups considered, depending on the study design (exposed/ unexposed or healthy/ ill) and the comparability of the groups finally selected in terms of all criteria except the exposure or the health outcome (statistical tests or sample descriptive statistics) | The cases and controls or exposed and unexposed participants are selected from the different settings and present different social, demographical, and biological characteristics (p-values < 0.05 or not reported, or not assessed) | An intermediate situation, where the groups are somehow comparable, because of the same criteria or the target/ accessible population used for the participant selection, and somehow comparable descriptive statistics between groups (no statistically significant difference for most of the characteristics between groups) | The cases and controls or exposed and unexposed participants are selected from the same population, based on the same inclusion/ exclusion criteria and participation rate is similar in the both groups. Moreover, the statistical comparison of the groups did not reveal any statistically significant difference in terms of participant characteristics other than the exposure or the outcome, depending on the study design |
| I.3. Sample size and statistical power                            | To appraise this criteria, please consider the number of subjects in reference and in each group should be considered for the appraisal of this criteria                                                                                                                                                                                                          | < 20                                                                                                                                                                                                                                 | 20–50                                                                                                                                                                                                                                                                                                                           | ≥ 50                                                                                                                                                                                                                                                                                                                                                                                                                               |
| II. Study design quality                                          |                                                                                                                                                                                                                                                                                                                                                                   |                                                                                                                                                                                                                                      |                                                                                                                                                                                                                                                                                                                                 |                                                                                                                                                                                                                                                                                                                                                                                                                                    |
| II.1. Potential of confounding bias                               | To appraise this criteria, please consider how the authors address the                                                                                                                                                                                                                                                                                            | The reported results are significantly different with                                                                                                                                                                                | The reported results are not significantly different with respect                                                                                                                                                                                                                                                               | The cases and controls were matched on these factors, or the results                                                                                                                                                                                                                                                                                                                                                               |

|                                                             |                                                                                                                                                                                                                                                                                                                                                                                                                                                                                                                                                                                              |                                                                                                            |                                                                                                                   |                                                                                                                                                 |
|-------------------------------------------------------------|----------------------------------------------------------------------------------------------------------------------------------------------------------------------------------------------------------------------------------------------------------------------------------------------------------------------------------------------------------------------------------------------------------------------------------------------------------------------------------------------------------------------------------------------------------------------------------------------|------------------------------------------------------------------------------------------------------------|-------------------------------------------------------------------------------------------------------------------|-------------------------------------------------------------------------------------------------------------------------------------------------|
|                                                             | potential confound for at least three following factors: Age-, Sex-, Smoking status (1 = significantly different or no data collected; 2 = not statistically different; 3 = matched or reported by risk factor group                                                                                                                                                                                                                                                                                                                                                                         | respect to the age, sex and smoking status or no data on them were collected                               | to the age, sex and smoking status                                                                                | are reported by risk factor group (as result of the analyses stratified by age, sex and smoking status)                                         |
| II.2.a Potential for misclassification bias on the exposure | To appraise this criteria, please consider how measurement of the exposure was done and which data were used for assessing cumulative exposure. If the study design is based on the healthy/ ill participants, please address the criteria II.2b                                                                                                                                                                                                                                                                                                                                             | Assessed by researcher, without individual data, or with only qualitative individual data (questionnaires) | Assessed by the research team including hygienists air measurements and individual data on duration of employment | Assessed based on biological monitoring measurements and individual work history data                                                           |
| II.2.b Potential for misclassification bias on the outcome  | To appraise this criteria, please consider how the diagnosis of disease was done                                                                                                                                                                                                                                                                                                                                                                                                                                                                                                             | The cases were identified using existent medical records                                                   | The cases were examined by a study physician and confirmed as such                                                | All study subjects were examined by the expert physician, and the diagnosis of each case was confirmed using the reference diagnostic procedure |
| III. Analytical/ technical quality                          | To appraise this criteria, please consider how thoroughly the laboratory analysis were conducted, in particular whether the author described the comparability of assessment methods if there is more than one group, the solvents used, the detector parameters (e.g., masse, UV-V), the internal or external calibration, and in case of internal calibration, the name/ RT of the compounds (except for immuno-essays), the LOD, LOQ, linearity, specificity, precision, accuracy, recovery rate, ,description of matrix effect, contamination, and criteria for acceptance of the method | Only LOD and LOQ were specified                                                                            | Only 1/3 - small half of criteria were specified                                                                  | More than half or 2/3 of the criteria were specified                                                                                            |

|                                                                   |                                                                                                                                                                                                                                                                                                                                                                         |                                                          |                                                                                                          |                                                                                                                                                                                                                                                |
|-------------------------------------------------------------------|-------------------------------------------------------------------------------------------------------------------------------------------------------------------------------------------------------------------------------------------------------------------------------------------------------------------------------------------------------------------------|----------------------------------------------------------|----------------------------------------------------------------------------------------------------------|------------------------------------------------------------------------------------------------------------------------------------------------------------------------------------------------------------------------------------------------|
| III.1. Quality of laboratory analysis                             |                                                                                                                                                                                                                                                                                                                                                                         |                                                          |                                                                                                          |                                                                                                                                                                                                                                                |
| III.2                                                             | Please assign the number of points accordingly to the specifications provided                                                                                                                                                                                                                                                                                           | Only succinct commentary of the method used was provided | The author followed and reporting the recommended guidelines used for their measurements                 | Full description of the validation of the method and guideline used, transitions, quantifications ions, confirmations ions, retention time of compounds, in case of internal calibration, the name/ RT of the compounds performed was reported |
| III.3. Measurements by ELISA or other techniques                  | Please assign the number of points accordingly to the specifications provided                                                                                                                                                                                                                                                                                           | Only succinct commentary of the method used was provided | The author set up their own technique and reported their validated analytical performance                | The authors used a commercialized kit recognized as reference used                                                                                                                                                                             |
| IV. Quality of the data processing, analysis and result reporting | To appraise this criteria, please consider how thoroughly the statistical methods were described, including the methods used to examine subgroups, confoundings, effect modifications and interactions, how missing data were addressed, and how the statistical significance was assessed. Please consider if the confidence intervals were given for the main results |                                                          | Only some of criteria were specified and only p-values were reported for the significance of the results | More than 2/3 of the criteria were specified and confidence intervals were reported for the main results                                                                                                                                       |

Table S2. Quality appraisal.

7

| Articles                                                          | 1            | 2          | 3          | 4                   | 5         |
|-------------------------------------------------------------------|--------------|------------|------------|---------------------|-----------|
| Quality Criteria/ Studies                                         | Adetona A.M. | Adetona O. | Argawal R. | Argawal R.-Shawn D. | Akbari M. |
| <b>I. Study sample quality</b>                                    |              |            |            |                     |           |
| I.1. Representativeness of the study sample                       | 2            | 2          | 2          | 2                   | 2         |
| I.2. Between group comparability and potential for selection bias | 2            | 2          | 2          | 2                   | 2         |
| I.3. Sample size and statistical power                            | 1            | 1          | 1          | 1                   | 2         |
| <b>II. Study design quality</b>                                   |              |            |            |                     |           |
| II.1. Potential of confounding bias                               | 3            | 3          | 2          | 2                   | 3         |
| II.2.a Potential for misclassification bias on the exposure       | 2            | 1          | 1          | 1                   | 1         |
| II.2.b Potential for misclassification bias on the outcome        | 3            | 3          | 2          | 2                   | 2         |
| <b>III. Analytical/ technical quality</b>                         |              |            |            |                     |           |
| III.1. Quality of laboratory analysis                             | 0            | 0          | 0          | 0                   | 0         |
| III.2 Measurements by mass spectrometry                           | 2            | 2          | 2          | 2                   | 1         |
| III.3. Measurements by ELISA or other techniques                  | 0            | 0          | 0          | 0                   | 0         |

|                                                                                                                                                    |          |          |          |          |          |
|----------------------------------------------------------------------------------------------------------------------------------------------------|----------|----------|----------|----------|----------|
| <b>IV. Quality of the data processing, analysis and result reporting</b>                                                                           | 3        | 2        | 2        | 3        | 3        |
| <b>Final score</b> (sum of the points assigned to each of above-cited criteria, the highest score is 27 (3 points assigned to each of 9 criteria)) | 18       | 16       | 14       | 15       | 16       |
| <b>Quality level</b> (< or = 13 = Low; 14 to 19 = Moderate; > 20 = High)                                                                           | Moderate | Moderate | Moderate | Moderate | Moderate |

\*studies included in the meta-analysis.

| 6        | 7           | 8           | 9              | 10      | 11            | 12       | 13        | 14           | 15         |
|----------|-------------|-------------|----------------|---------|---------------|----------|-----------|--------------|------------|
| Aksu N.  | Allen R. W. | Al-Saleh I. | Anderson G. W. | Ates I. | Bellisario V. | Bin P.   | Boonla C. | Boudouris G. | Boyle S.P. |
| 2        | 2           | 2           | 2              | 2       | 2             | 2        | 2         | 1            | 2          |
| 2        | 2           | 2           | 2              | 1       | 2             | 2        | 2         | 1            | 2          |
| 3        | 2           | 3           | 1              | 3       | 3             | 3        | 3         | 1            | 1          |
| 2        | 2           | 2           | 2              | 1       | 2             | 2        | 2         | 2            | 2          |
| 2        | 1           | 1           | 2              | 1       | 1             | 1        | 1         | 2            | 1          |
| 2        | 1           | 2           | 2              | 1       | 2             | 1        | 1         | 3            | 1          |
| 0        | 0           | 2           | 0              | 0       | 0             | 0        | 0         | 0            | 0          |
| 0        | 0           | 2           | 2              | 1       | 0             | 0        | 3         | 1            | 1          |
| 1        | 1           | 0           | 0              | 0       | 1             | 3        | 0         | 0            | 0          |
| 2        | 3           | 2           | 2              | 2       | 2             | 2        | 2         | 1            | 3          |
| 16       | 14          | 18          | 15             | 12      | 15            | 16       | 16        | 12           | 13         |
| Moderate | Moderate    | Moderate    | Moderate       | Low     | Moderate      | Moderate | Moderate  | Low          | Low        |
